# Supplementary material for: Longitudinal Assessments of Neurocognitive Performance and Brain Structure Associated With Initiation of Tobacco Use in Children, 2016 to 2021
Source: PubMed Central journal article supplement (PMC9366547; doi:10.1001/jamanetworkopen.2022.25991), 2022-08-10
Supplement: jamanetwopen-e2225991-s001.pdf [file jamanetwopen-e2225991-s001.pdf]

## Supplementary Online Content

Dai HD, Doucet GE, Wang Y, et al. Longitudinal assessments of neurocognitive performance and brain structure associated with initiation of tobacco use in children, 2016 to 2021. *JAMA Netw Open.* 2022;5(8):e2225991.  
doi:10.1001/jamanetworkopen.2022.25991

**eMethods.** Participant Inclusion and Exclusion Criteria

**eTable 1.** Participant Characteristics

**eTable 2.** Comparison of sMRI Morphometric Measures Within Cerebral Hemisphere Between Tobacco Ever Users and Nonusers

**eTable 3.** Region of Interest Analysis of Cortical Volume Between Tobacco Ever Users and Nonusers

**eTable 4.** Sensitivity Analysis of Cognitive Performances and sMRI Morphometric Measures With Adjustment of Intracranial Volume

**References**

This supplementary material has been provided by the authors to give readers additional information about their work.

## eMethods. Participant Inclusion and Exclusion Criteria:

As illustrated in Figure 1 in the main text, the ABCD study included 11,876 participants enrolled at Wave 1 (2016-2018) and 10,414 participants at 2-year follow-up (2018-2021) with a retention rate of 87.7%. After excluding participants with missing tobacco ever use status and the NIH Toolbox Cognition Battery measures, Waves 1 and 2 included 11,729 and 10,081 participants, respectively, forming the analytical sample of the cognitive performances. After excluding participants with missing MRI, participants with neuroradiology reports of hydrocephalus and herniation, participants with poor MRI image quality, poor FreeSurfer deconstruction, or traumatic brain injury with loss of consciousness, and those with several medical conditions, such as muscular dystrophy, multiple sclerosis, sickle cell anemia, neoplastic disorders, cerebral palsy, diabetes, epilepsy, lead poisoning, cardiac and kidney disorders, the final analytical sample for MRI neuroimaging outcomes included 10,214 and 6,859 participants for Waves 1 and 2, respectively. The selection procedure was based on the protocols in our previous studies and ABCD study MRI quality control guidelines.<sup>1,2</sup>

ABCD participants with complete tobacco use status and NIH-toolkit measured cognition were excluded from the analysis of neuroimaging outcomes for the criteria outlined below. Wave 1 and Wave 2 bear the same exclusionary criteria, while the difference in the initial census was due to participation attrition over the 2-year follow-up period.

### Exclusion of participants from brain structural analysis due to technical neuroimaging issues or medical reasons:

- Missing MRI data (Wave 1 n = 115, Wave 2 n = 2,585)
- Participants with neuroradiology reports of hydrocephalus or herniation or other incidental findings meriting clinical referral.

*ABCD Data Structure = MR Findings (abcd\_mrfindings02), element = mrf\_score >= 3, exclude. (Wave 1 n = 444, Wave 2 n = 357)*

- Poor MRI image quality defined as no series passing quality control while ignoring protocol compliance.

*ABCD Data Structure = ABCD MRI QC Raw Part 1 (mriqcrp10301), element = iq\_t1\_ok\_ser=0, exclude. (Wave 1 n = 6, Wave 2 n = 3)*

- Incomplete or poor freeSurfer deconstruction defined as QC score, motion score, pial overestimation score, white matter underestimation score, inhomogeneity score, or artifact score.

*ABCD Data Structure = FreeSurfer QC (fsurfqc01), element = fsqc\_qc=0 or fsqc\_qu\_motion>2 or fsqc\_qu\_pialover>2 or fsqc\_qu\_wmunder>2 or fsqc\_qu\_inhomogeneity>2 or fsqc\_qu\_artifact>2, exclude. (Wave 1 n = 354, Wave 2 n = 124)*

- Traumatic Brain Injury with Loss of Consciousness

*ABCD Data Structure = ABCD Sum Scores Traumatic Brain Injury (abcd\_tbi01), element =tbi\_ss\_ntbiloc>0, exclude. (Wave 1 n = 133, Wave 2 n = 90)*

- Severe medical conditions including muscular dystrophy, multiple sclerosis, sickle cell anemia, neoplastic disorders, cerebral palsy, diabetes, epilepsy, lead poisoning, cardiac and kidney disorders.

*ABCD Data Structure = Medical History and Health Services Utilization (mx01), element=max(medhx\_2l, medhx\_2m, medhx\_2p, medhx\_2e, medhx\_2f, medhx\_2g, medhx\_2h, medhx\_2k, medhx\_2o, medhx\_2j)=1, exclude. (Wave 1 n = 713, Wave 2 n = 471)*

Note: These variables are available under aliases in the current release of ABCD data and may change in the future.

**eTable 1. Participant Characteristics**

| Characteristics                  | All<br>n | Wave 1              |                  |                      | Wave 2 (2-Year Follow-Up) |                  |                      |
|----------------------------------|----------|---------------------|------------------|----------------------|---------------------------|------------------|----------------------|
|                                  |          | Non Use             | Ever Use         | P-value <sup>a</sup> | Non Use                   | Ever Use         | P-value <sup>a</sup> |
|                                  |          | 11,613              | 116              |                      | 9,995                     | 86               |                      |
|                                  |          | 8,015,361           | 98,309           |                      | 6,844,671                 | 74,255           |                      |
| Age, mean (SE), year             | 11,729   | 9.9 (0.6)           | 10 (0.6)         | .18                  | 12.0 (0.7)                | 12.0 (0.7)       | .47                  |
| Sex                              |          | Weighted % (95% CI) |                  | .04                  | Weighted % (95% CI)       |                  | <.001                |
| Male                             | 6116     | 51.1 (50.2-52)      | 58.8 (51.4-66.2) |                      | 51.2 (50.1-52.4)          | 62.7 (56.8-68.7) |                      |
| Female                           | 5613     | 48.9 (48-49.8)      | 41.2 (33.8-48.6) |                      | 48.8 (47.6-49.9)          | 37.3 (31.3-43.2) |                      |
| Race/ethnicity                   |          |                     |                  | .04                  |                           |                  | .10                  |
| White                            | 6112     | 52.2 (40.5-63.9)    | 61.3 (46.6-76)   |                      | 53.8 (41.9-65.7)          | 65.5 (49.6-81.4) |                      |
| Black                            | 1750     | 13.3 (8-18.5)       | 13.9 (4.4-23.3)  |                      | 12 (7-17.1)               | 10.3 (1-19.5)    |                      |
| Hispanics                        | 2381     | 24 (11.2-36.8)      | 14.5 (0-29.4)    |                      | 23.8 (11-36.6)            | 13.8 (0-29.7)    |                      |
| Asians                           | 252      | 3.7 (1.8-5.6)       | 0.7 (0-2.4)      |                      | 3.6 (1.7-5.5)             | 1 (0-3.1)        |                      |
| Other                            | 1232     | 6.9 (4.8-9)         | 9.6 (1.8-17.4)   |                      | 6.8 (4.5-9.1)             | 9.5 (0-19)       |                      |
| Parental education level         |          |                     |                  | <.0001               |                           |                  | .005                 |
| Less than high school            | 660      | 6.9 (4.1-9.7)       | 5.2 (0.2-10.2)   |                      | 6.4 (3.5-9.2)             | 4.5 (0-9.8)      |                      |
| High school diploma or GED       | 1164     | 11.6 (9.4-13.8)     | 16.7 (6.1-27.2)  |                      | 10.5 (8.3-12.7)           | 10.5 (1.2-19.9)  |                      |
| Some college or associate degree | 2979     | 28.7 (25.1-32.3)    | 48.2 (36.3-60.1) |                      | 28.1 (24.1-32)            | 47.7 (33-62.5)   |                      |
| Bachelor degree                  | 3200     | 25.6 (22.1-29.2)    | 18.4 (13.3-23.6) |                      | 26.7 (23.1-30.4)          | 20.8 (15-26.5)   |                      |
| Postgraduate degree              | 3726     | 27.2 (22.8-31.6)    | 11.5 (5.4-17.6)  |                      | 28.3 (23.3-33.3)          | 16.4 (7.7-25.1)  |                      |
| Family income                    |          |                     |                  | <.001                |                           |                  | <.0001               |
| <\$25,000                        | 1609     | 17 (13-21)          | 27.2 (16.3-38.1) |                      | 15.4 (11.2-19.6)          | 30.5 (20.2-40.8) |                      |
| \$25,000-\$49,999                | 1560     | 18.1 (15-21.2)      | 24.9 (14.9-35)   |                      | 18.2 (14.8-21.6)          | 22.4 (11.4-33.4) |                      |
| \$50,000-\$74,999                | 1485     | 15.8 (14-17.5)      | 22.3 (11.3-33.4) |                      | 16.1 (14.3-18)            | 24.3 (13.5-35.1) |                      |
| \$75,000-\$99,999                | 1552     | 12.4 (10.5-14.2)    | 7.9 (3.4-12.3)   |                      | 12.9 (11-14.8)            | 9.6 (3.8-15.5)   |                      |

|                                |       |                  |                  |        |                  |                  |        |
|--------------------------------|-------|------------------|------------------|--------|------------------|------------------|--------|
| \$100,000+                     | 4517  | 27.3 (21.1-33.5) | 8.4 (2.7-14.1)   |        | 28.4 (21.9-34.8) | 8.9 (2.2-15.6)   |        |
| Don't know or refuse to answer | 1006  | 9.4 (7.6-11.3)   | 9.2 (3.3-15.2)   |        | 8.9 (7.2-10.7)   | 4.3 (0-9.3)      |        |
| Family Difficulty              |       |                  |                  | <.0001 |                  |                  | <.0001 |
| No                             | 10145 | 83.9 (81.3-86.6) | 69.4 (58.2-80.7) |        | 84.9 (82-87.9)   | 68.8 (56.7-80.9) |        |
| Yes                            | 1584  | 16.1 (13.4-18.7) | 30.6 (19.3-41.8) |        | 15.1 (12.1-18)   | 31.2 (19.1-43.3) |        |
| Premature                      |       |                  |                  | .09    |                  |                  | .11    |
| No                             | 9403  | 81.2 (75.1-87.4) | 73.4 (57.7-89.2) |        | 80.9 (74.5-87.4) | 70.6 (50.9-90.4) |        |
| Yes                            | 2183  | 18.8 (12.6-24.9) | 26.6 (10.8-42.3) |        | 19.1 (12.6-25.5) | 29.4 (9.6-49.1)  |        |
| Other Substance Ever Use       |       |                  |                  | <.001  |                  |                  | <.001  |
| No                             | 9065  | 78.3 (75.1-81.5) | 40.1 (32.1-48.1) |        | 78 (74.6-81.5)   | 44.3 (36.8-51.7) |        |
| Yes                            | 2664  | 21.7 (18.5-24.9) | 59.9 (51.9-67.9) |        | 22 (18.5-25.4)   | 55.7 (48.3-63.2) |        |

<sup>a</sup>: Rao-Scott Chi-square tests were performed to compare characteristics between tobacco ever users and non-users, accounting for sampling weights and site clustering.

**eTable 2. Comparison of sMRI Morphometric Measures Within Cerebral Hemisphere Between Tobacco Ever Users and Nonusers<sup>a</sup>**

| Weighted Mean (SE)                              | Wave 1             |                         | Unadjusted B <sup>b</sup> | Adjusted p-value <sup>c</sup> | Wave 2 (2-Year Follow-Up) |                         | Unadjusted B <sup>b</sup> | Adjusted p-value <sup>c</sup> |
|-------------------------------------------------|--------------------|-------------------------|---------------------------|-------------------------------|---------------------------|-------------------------|---------------------------|-------------------------------|
|                                                 | Non Use (n=10,117) | Tobacco Ever Use (n=97) |                           |                               | Non Use (n=6,806)         | Tobacco Ever Use (n=53) |                           |                               |
| <b>Left Hemisphere</b>                          |                    |                         |                           |                               |                           |                         |                           |                               |
| Total cortical surface area (mm <sup>2</sup> )  | 94292 (469.6)      | 92476 (1293.2)          | -2495.3 (865.4)           | .004 <sup>c</sup>             | 94696 (470.5)             | 93374 (1599.4)          | -2624.5 (1206.8)          | .03                           |
| Mean cortical thickness (mm)                    | 2.7 (0)            | 2.7 (0)                 | 0 (0)                     | .43                           | 2.7 (0)                   | 2.7 (0)                 | 0 (0)                     | .13                           |
| Total cortical volume (mm <sup>3</sup> )        | 297296 (1207.1)    | 291198 (3764.5)         | -8595.5 (2963.7)          | .004 <sup>c</sup>             | 293056 (1325.5)           | 286962 (5424.1)         | -10588.7 (3590.0)         | .003 <sup>c</sup>             |
| Cerebral white matter volume (mm <sup>3</sup> ) | 209138 (886.8)     | 206307 (3032)           | -4185.1 (2350.4)          | .08                           | 216347 (886)              | 215285 (4544.4)         | -3952.8 (3388.7)          | .24                           |
| <b>Right Hemisphere</b>                         |                    |                         |                           |                               |                           |                         |                           |                               |
| Total cortical surface area (mm <sup>2</sup> )  | 94431 (473.8)      | 92612 (1280.9)          | -2519.5 (880.0)           | .004 <sup>c</sup>             | 94815 (470.8)             | 93458 (1623.2)          | -2753.0 (1176.9)          | .02                           |
| Mean cortical thickness (mm)                    | 2.7 (0)            | 2.7 (0)                 | 0 (0)                     | .43                           | 2.7 (0)                   | 2.7 (0)                 | 0 (0)                     | .13                           |
| Total cortical volume (mm <sup>3</sup> )        | 297574 (1221.6)    | 291379 (3937.6)         | -8866.6 (2907.5)          | .002 <sup>c</sup>             | 293249 (1350.3)           | 286536 (5623.3)         | -11202.1 (3467.2)         | .001 <sup>c</sup>             |
| Cerebral white matter volume (mm <sup>3</sup> ) | 209225 (905.6)     | 206308 (3103.5)         | -4272.2 (2354.9)          | .07                           | 216439 (912.8)            | 215434 (4635.9)         | -4163.0 (3287.1)          | .20                           |

<sup>a</sup>: Multivariate regression analyses were performed where the dependent variables were sMRI measures in the left and right hemispheres. The independent variable was early age tobacco initiation (ever use of tobacco) measured at Wave 1. The analysis was adjusted by covariates, including age, sex, race/ethnicity, pubertal stage, substance ever use, parental monitoring, school environment, handedness, imaging device manufacturer, and study site. Sampling weights were incorporated to remove the sampling bias.

<sup>b</sup>: Regression coefficients measured the effects of early-age tobacco initiation as changes in sMRI variables between tobacco ever users versus control (no use).

<sup>c</sup>: FDR testing correction was performed to prevent inflation of Type I errors. Adjusted p-value with FDR<0.05 is indicated by this footnote.

**eTable 3. Region of Interest Analysis of Cortical Volume Between Tobacco Ever Users and Nonusers<sup>a</sup>**

|          | Cortical Volume (mm <sup>2</sup> )<br>Weighted Mean (SE) | Wave 1                |                               |                         |                     |                      | Wave 2 (2-Year Follow-Up) |                               |                         |                     |       | FDR <sup>c</sup> |
|----------|----------------------------------------------------------|-----------------------|-------------------------------|-------------------------|---------------------|----------------------|---------------------------|-------------------------------|-------------------------|---------------------|-------|------------------|
|          |                                                          | Non Use<br>(n=10,117) | Tobacco<br>Ever Use<br>(n=97) | Adjusted B <sup>b</sup> | Adjusted<br>p-value | FD<br>R <sup>c</sup> | Non Use<br>(n=6,806)      | Tobacco<br>Ever Use<br>(n=53) | Adjusted B <sup>b</sup> | Adjusted<br>p-value |       |                  |
| Frontal  | Superior frontal                                         | 57799<br>(299.1)      | 56016<br>(819.7)              | -2849.9                 | <.001               | .004                 | 57325<br>(307.7)          | 54983<br>(1219.1)             | -3669.3                 | <.001               | .004  |                  |
|          | Rostral middle                                           | 42501<br>(219.1)      | 41773<br>(719.2)              | -1572.3                 | .01                 | .03                  | 41793<br>(241.4)          | 40822<br>(966.6)              | -1793.2                 | .02                 | .04   |                  |
|          | Caudal middle                                            | 16074<br>(136.2)      | 15631<br>(341.2)              | -899.9                  | .01                 | .03                  | 16034<br>(132.5)          | 15142<br>(472.7)              | -1357.2                 | .001                | .006  |                  |
|          | Pars opercularis                                         | 11019<br>(53.1)       | 10833<br>(202.2)              | -332.7                  | .19                 | .23                  | 10939 (55)                | 10878<br>(290.4)              | -237.2                  | .47                 | .51   |                  |
|          | Pars triangularis                                        | 10810<br>(37.3)       | 10740<br>(213.4)              | -139                    | .47                 | .48                  | 10615<br>(49.4)           | 10564<br>(248.9)              | -207.1                  | .36                 | .42   |                  |
|          | Pars orbitalis                                           | 6955.1<br>(26.5)      | 6833.2<br>(90.2)              | -274.2                  | .02                 | .04                  | 6837.1 (32)               | 6644.6<br>(171.2)             | -409.6                  | .01                 | .03   |                  |
|          | Lateral orbitofrontal                                    | 18472<br>(99.2)       | 18103<br>(238.6)              | -613.5                  | .01                 | .03                  | 18331<br>(114.5)          | 17919<br>(309.1)              | -774.3                  | .009                | .02   |                  |
|          | Medial orbitofrontal                                     | 12664<br>(93.2)       | 12410<br>(170.6)              | -511.6                  | <.001               | .004                 | 12492<br>(97.5)           | 12156<br>(212.3)              | -628.6                  | <.001               | <.001 |                  |
|          | Precentral                                               | 31495<br>(137.3)      | 30796<br>(381.2)              | -1409.9                 | <.001               | .003                 | 31541<br>(138)            | 30849 (617)                   | -1443.7                 | <.001               | .005  |                  |
|          | Paracentral                                              | 9353.2<br>(34.5)      | 9045<br>(159.7)               | -362.1                  | .003                | .01                  | 9174.7<br>(36.2)          | 8840.4<br>(177.6)             | -462.5                  | .004                | .01   |                  |
|          | Frontal pole                                             | 2987.9<br>(19.9)      | 2957.6<br>(39.7)              | -86.6                   | .11                 | .16                  | 2903.6<br>(19.3)          | 2869.8<br>(67.6)              | -125.2                  | .04                 | .07   |                  |
|          |                                                          | Rostral anterior      | 5520 (33.4)                   | 5465.4<br>(97.3)        | -258.6              | .02                  | .04                       | 5514.3<br>(32.7)              | 5415 (144.5)            | -304.6              | .04   | .07              |
|          | Caudal anterior                                          | 4616 (23.9)           | 4576.1<br>(134.8)             | -181.9                  | .12                 | .16                  | 4617.8<br>(24.7)          | 4518.3 (171)                  | -299.9                  | .04                 | .07   |                  |
| Parietal | Superior parietal                                        | 34215<br>(191.5)      | 33621<br>(521.9)              | -1054.8                 | .04                 | .07                  | 33148<br>(211.2)          | 32719<br>(607.3)              | -1266.8                 | .02                 | .04   |                  |
|          | Inferior parietal                                        | 35488<br>(129.7)      | 34582<br>(653.2)              | -1337.1                 | .02                 | .04                  | 34507<br>(173.3)          | 32922<br>(762.1)              | -2356.3                 | <.001               | .004  |                  |

|               |                                   |                  |                   |         |       |      |                  |                   |         |       |       |
|---------------|-----------------------------------|------------------|-------------------|---------|-------|------|------------------|-------------------|---------|-------|-------|
|               | Supramarginal                     | 27765<br>(99.7)  | 26743<br>(337.6)  | -1390.1 | .005  | .01  | 27199<br>(120.3) | 26963<br>(499.3)  | -967.9  | .14   | .21   |
|               | Postcentral                       | 23436<br>(98.4)  | 23024<br>(485.4)  | -710.2  | .10   | .14  | 22914<br>(103.2) | 22165<br>(715.6)  | -1278.9 | .008  | .02   |
|               | Precuneus                         | 25397<br>(111.6) | 24784<br>(392.6)  | -1122.3 | .002  | .006 | 24587<br>(123)   | 24004<br>(377.1)  | -1334.8 | <.001 | .004  |
|               | Posterior cingulate               | 8006.1<br>(28.6) | 7869.7<br>(122)   | -227.9  | .06   | .09  | 7859.7<br>(32.8) | 7760.5<br>(138.1) | -259.2  | .12   | .18   |
|               | Isthmus cingulate                 | 6277.5<br>(25.8) | 6194.6<br>(117.8) | -180    | .06   | .09  | 6133.4<br>(31.1) | 6099 (136.5)      | -135.9  | .23   | .32   |
| Tempor<br>al  | Superior temporal                 | 30408<br>(126.3) | 29188<br>(392.2)  | -1537.6 | <.001 | .004 | 30020<br>(138.5) | 29404<br>(730.7)  | -896    | .15   | .21   |
|               | Inferior temporal                 | 26561<br>(133.6) | 26350<br>(431.8)  | -820.2  | .05   | .08  | 26428<br>(144.7) | 25952<br>(760.8)  | -1114.4 | .05   | .08   |
|               | Middle temporal                   | 29594<br>(123.8) | 28379<br>(516.9)  | -1854.2 | 0     | .001 | 29327<br>(151.6) | 28245<br>(795.9)  | -1761.1 | .003  | .01   |
|               | Banks of superior temporal sulcus | 5866.6<br>(32.1) | 5561.8<br>(119.1) | -352.7  | <.001 | .004 | 5756.9<br>(30.9) | 5431.1<br>(141.4) | -493.1  | 0     | <.001 |
|               | Fusifiform                        | 22129 (85)       | 21673<br>(319.3)  | -986.3  | <.001 | .004 | 21976 (86)       | 21373<br>(514.9)  | -1116.2 | .002  | .006  |
|               | Transverse temporal               | 2627.3<br>(13.1) | 2570.6<br>(46.8)  | -83.5   | .14   | .18  | 2587.4 (15)      | 2574.7<br>(70.9)  | -59.5   | .48   | .51   |
|               | Entorhinal                        | 3705.5<br>(21.4) | 3817 (62.1)       | 76.4    | .44   | .47  | 3757.2<br>(19.9) | 3847.2<br>(90.3)  | 9.6     | .92   | .92   |
|               | Temporal pole                     | 5447.5 (25)      | 5546.2<br>(74.7)  | -66.2   | .40   | .44  | 5453.1<br>(20.9) | 5527.6 (113)      | -100.4  | .35   | .42   |
|               | Parahippocampal                   | 4355.2<br>(18.5) | 4206.8<br>(57.7)  | -218.3  | .002  | .006 | 4362 (20.6)      | 4231.5<br>(42.1)  | -252    | .002  | .009  |
| Occipit<br>al | Lateral occipital                 | 29078<br>(168.3) | 29066<br>(449.9)  | -547.3  | .25   | .30  | 28489<br>(188.3) | 28521<br>(695.6)  | -723.2  | .28   | .345  |
|               | Lingual                           | 15973<br>(86.7)  | 15871<br>(311.8)  | -378.5  | .15   | .19  | 15686<br>(91.1)  | 15909 (306)       | -248.7  | .48   | .51   |
|               | Cuneus                            | 7885.3<br>(47.4) | 8081.8<br>(151.9) | 60.5    | .70   | .70  | 7678.2<br>(50.6) | 7999.5<br>(179.6) | 247.4   | .27   | .35   |
|               | Pericalcarine                     | 5134.5<br>(34.8) | 5210.3<br>(76.1)  | -114.4  | .32   | .36  | 5078.3 (43)      | 5235.9<br>(127.6) | 41.2    | .80   | .82   |



|  |        |                 |                  |        |     |     |                 |                  |      |     |     |
|--|--------|-----------------|------------------|--------|-----|-----|-----------------|------------------|------|-----|-----|
|  | Insula | 15251<br>(80.6) | 15056<br>(161.1) | -368.3 | .08 | .12 | 15240<br>(76.5) | 15011<br>(236.1) | -546 | .02 | .04 |
|--|--------|-----------------|------------------|--------|-----|-----|-----------------|------------------|------|-----|-----|

<sup>a</sup>: Multivariate regression analyses were performed where the dependent variables were cortical volumes in 34 regions of interest. The independent variable was early age tobacco initiation (ever use of tobacco) measured at Wave 1. The analysis was adjusted by covariates, including age, sex, race/ethnicity, pubertal stage, substance ever use, parental monitoring, school environment, handedness, imaging device manufacturer, and study site. Sampling weights were incorporated to remove the sampling bias.

<sup>b</sup>: Regression coefficients measured the effects of early-age tobacco initiation as changes in sMRI variables between tobacco ever users versus control (no use).

<sup>c</sup>: FDR correction was performed across 34 regions to prevent inflation of Type I errors.

**eTable 4. Sensitivity Analysis of Cognitive Performances and sMRI Morphometric Measures With Adjustment of Intracranial Volume<sup>a</sup>**

| NIH Toolbox Cognition Battery Weighted Mean (SE)  | Wave 1           |                          | Adjusted B (SE) <sup>a,b</sup> | Adjusted p-value <sup>c</sup> | Wave 2 (2-Year Follow-Up) |                         | Adjusted B (SE) <sup>a,b</sup> | Adjusted p-value <sup>c</sup> |
|---------------------------------------------------|------------------|--------------------------|--------------------------------|-------------------------------|---------------------------|-------------------------|--------------------------------|-------------------------------|
|                                                   | No Use (n=11613) | Tobacco Ever Use (n=116) |                                |                               | No Use (n=10,117)         | Tobacco Ever Use (n=86) |                                |                               |
| Dimensional Change Card Sort                      | 92.3 (0.3)       | 91.5 (1)                 | -0.1 (1.5)                     | .95                           | NA                        | NA                      | NA                             | NA                            |
| Flanker Inhibitory Control and Attention          | 93.8 (0.3)       | 94 (0.7)                 | 0.7 (1.0)                      | .47                           | 99.9 (0.3)                | 100 (1.4)               | 0.5 (2.2)                      | .81                           |
| List Sorting Working Memory                       | 96.1 (0.5)       | 93.9 (1)                 | -1.2 (1.3)                     | .36                           | NA                        | NA                      | NA                             | NA                            |
| Oral Reading Recognition                          | 90.6 (0.2)       | 88.7 (0.6)               | -2.9 (1.5)                     | .06                           | 94.7 (0.3)                | 93.1 (0.5)              | -1.2 (0.8)                     | .12                           |
| Pattern Comparison Process Speed                  | 88 (0.5)         | 84.8 (1.2)               | -3.5 (1.6)                     | .04                           | 103.3 (0.5)               | 101 (1.7)               | -0.2 (0.4)                     | .57                           |
| Picture Sequence Memory                           | 102.6 (0.4)      | 100.1 (0.8)              | -2.7 (1.3)                     | .05                           | 108.5 (0.4)               | 104.7 (2)               | -4.6 (2.1)                     | .04                           |
| Picture Vocabulary Tests                          | 84 (0.5)         | 82 (0.8)                 | -2.3 (0.6)                     | .001 <sup>c</sup>             | 88.5 (0.5)                | 87 (1.1)                | -2.6 (0.8)                     | .003 <sup>c</sup>             |
| Crystallized Cognition Composite Score            | 86 (0.3)         | 83.8 (0.5)               | -1.7 (0.5)                     | .004 <sup>c</sup>             | 90.5 (0.4)                | 89.3 (0.8)              | -1.9 (0.9)                     | .05                           |
| Fluid Cognition Composite Score                   | 91.2 (0.5)       | 88.7 (0.7)               | -1.8 (1.3)                     | .16                           | NA                        | NA                      | NA                             | NA                            |
| Total Cognition Composite Score                   | 85.8 (0.5)       | 83 (0.6)                 | -2.2 (1.0)                     | .04                           | NA                        | NA                      | NA                             | NA                            |
| <b>Whole Brain Measures</b>                       |                  |                          |                                |                               |                           |                         |                                |                               |
| Total cortical surface area (mm <sup>2</sup> )    | 188723 (942.5)   | 185088 (2570.2)          | -690.8 (1065.8)                | .52                           | 189511 (940.5)            | 186833 (3217)           | -3355.5 (1236.7)               | .007 <sup>c</sup>             |
| Mean cortical thickness (mm)                      | 2.7 (0)          | 2.7 (0)                  | 0 (0)                          | .59                           | 2.7 (0)                   | 2.7 (0)                 | 0 (0)                          | .18                           |
| Total cortical volume (mm <sup>3</sup> )          | 594869 (2423.9)  | 582577 (7694.5)          | -3699.2 (3766.3)               | .003 <sup>c</sup>             | 586304 (2669.8)           | 573498 (11038)          | -15487.8 (3680.5)              | <.001 <sup>c</sup>            |
| Subcortical gray matter volume (mm <sup>3</sup> ) | 59777 (162.9)    | 59114 (600.6)            | -375.3 (351.6)                 | .29                           | 60533 (207.1)             | 60441 (776.9)           | -43.5 (431.1)                  | .92                           |
| Cerebral white matter volume (mm <sup>3</sup> )   | 418363 (1790.6)  | 412615 (6132)            | -3642.1 (2817.3)               | .20                           | 432787 (1797.2)           | 430719 (9166.7)         | -2271.7 (3954.2)               | .57                           |

<sup>a</sup>: Multivariate regression analyses were performed where the dependent variables were cognitive performance scores listed in the first column. The independent variable was early age tobacco initiation (ever use of tobacco) measured at Wave 1. The analysis was adjusted by covariates, including age, sex, race/ethnicity, pubertal stage, intracranial volume, substance ever use, parental monitoring, school environment, and study site. Sampling weights and site clustering were incorporated in the survey regression analytical procedures for statistical inference at the population level.

<sup>b</sup>: Regression coefficients measured the effects of early-age tobacco initiation as changes in cognitive performance scores between tobacco ever users versus control (no use).

NA: not available. Cognitive evaluation task was not performed in Wave 2.

<sup>c</sup>: FDR correction was performed to prevent inflation of Type I errors. Adjusted p-value with FDR<0.05 is indicated by this footnote.

## References

1. Vidal-Ribas P, Janiri D, Doucet GE, et al. Multimodal neuroimaging of suicidal thoughts and behaviors in a US population-based sample of school-age children. *American Journal of Psychiatry*. 2021;178(4):321-332.
2. Modabbernia A, Janiri D, Doucet GE, Reichenberg A, Frangou S. Multivariate Patterns of Brain-Behavior-Environment Associations in the Adolescent Brain and Cognitive Development Study. *Biol Psychiatry*. Mar 1 2021;89(5):510-520. doi:10.1016/j.biopsych.2020.08.014
